# Supplementary material for: Leptospira interrogans Serovar Icterohaemorrhagiae Failed to Establish Distinct Infection in Naïve Gilts: Lessons Learned from a Preliminary Experimental Challenge
Source: MDPI journal article supplement (doi:10.3390/pathogens12010135), 2023-01-13
Supplement: s1 [file s1]

**Table S1:** Microscopic agglutination test (MAT) titers of infected gilts (no 6, 8 and 9) against *Leptospira* serovar Icterohaemorrhagiae (inoculated serovar) on ten study days.

| <b>Study days</b> | <b>gilt no 6</b> | <b>gilt no 8</b> | <b>gilt no 9</b> |
|-------------------|------------------|------------------|------------------|
| D0                | 0                | 0                | 0                |
| D2                | 0                | 0                | 0                |
| D4                | 100              | 50               | 0                |
| D7                | 1600             | 800              | 100              |
| D10               | 800              | 800              | 100              |
| D14               | 800              | 1600             | 100              |
| D17               | 800              | 800              | 100              |
| D21               | 800              | 800              | 0                |
| D24               | 800              | 800              | 0                |
| D28               | 200              | 400              | 0                |
